# Supplementary material
Source: MDPI journal article supplement (https://www.mdpi.com/2297-8739/9/10/268)
Supplement: s1 [file s1]

Archive with 3 entries (3 files):
- Supplementary Figure S1.pdf
- Supplementary Figure S2.pdf
- Supplementary Table S1.pdf
