# Supplementary material
Source: MDPI journal article supplement (https://www.mdpi.com/2297-8739/9/10/268)
Supplement: s1 [file s1]

Supplementary Table S1. (A) Intensity of all lipid species identified in lipidomic analysis (arbitrary units). Results shown are those from Trizol and PBS homogenates obtained from tissue mass containing 0.5 mg of protein (n = 3). The color code indicates the relative abundance of each species within its lipid class, from light yellow to dark green. (B) R<sub>2</sub> coefficients of linear regressions of the for each lipid species. Intensities of each lipid species were plotted against the protein quantity of kidney mass used for lipid extraction (just as in Figure 1 for the sum of intensities). The table shows the R<sub>2</sub> coefficient of the regression.

| Lipid species           | (A) Intensity   |          |          |          |          |          | (B) R <sub>2</sub> coefficient |        |  |
|-------------------------|-----------------|----------|----------|----------|----------|----------|--------------------------------|--------|--|
|                         | Quality control |          | PBS      |          | Trizol   |          | PBS                            | Trizol |  |
|                         | Mean            | SD       | Mean     | SD       | Mean     | SD       |                                |        |  |
| CL(14:1_14:1_14:1_15:1) | 2,46E+07        | 2,89E+06 | 1,67E+07 | 9,32E+06 | 1,08E+07 | 1,10E+07 | 0,000                          | 0,069  |  |
| CL(18:2_16:1_18:2_18:2) | 5,58E+06        | 6,69E+05 | 5,46E+06 | 1,01E+06 | 3,24E+06 | 3,22E+06 | 0,616                          | 0,584  |  |
| CL(18:2_18:1_18:2_16:1) | 4,59E+06        | 3,38E+05 | 4,23E+06 | 1,08E+06 | 2,51E+06 | 2,50E+06 | 0,505                          | 0,544  |  |
| CL(70:5)                | 2,51E+06        | 2,94E+05 | 2,50E+06 | 6,37E+05 | 1,36E+06 | 1,50E+06 | 0,327                          | 0,502  |  |
| CL(18:2_18:2_18:2_18:2) | 6,52E+07        | 3,81E+06 | 6,22E+07 | 1,24E+07 | 3,36E+07 | 2,79E+07 | 0,564                          | 0,591  |  |
| CL(18:2_18:2_18:2_18:1) | 3,96E+07        | 3,44E+06 | 3,61E+07 | 8,34E+06 | 2,11E+07 | 1,86E+07 | 0,414                          | 0,549  |  |
| CL(18:2_18:1_18:1_18:2) | 1,24E+07        | 7,41E+05 | 1,16E+07 | 3,05E+06 | 6,38E+06 | 6,12E+06 | 0,315                          | 0,523  |  |
| CL(20:5_18:2_18:2_18:2) | 8,72E+06        | 1,95E+06 | 6,36E+06 | 1,29E+06 | 4,79E+06 | 4,20E+06 | 0,668                          | 0,591  |  |
| CL(18:2_18:2_18:2_20:4) | 1,52E+07        | 1,92E+06 | 1,40E+07 | 2,40E+06 | 8,54E+06 | 7,78E+06 | 0,699                          | 0,587  |  |
| CL(20:5_18:2_18:1_18:2) | 5,67E+06        | 1,60E+06 | 4,25E+06 | 1,24E+06 | 2,94E+06 | 3,17E+06 | 0,184                          | 0,551  |  |
| CL(18:2_18:2_18:2_20:3) | 6,69E+06        | 1,13E+06 | 4,59E+06 | 2,43E+06 | 3,24E+06 | 2,83E+06 | 0,320                          | 0,622  |  |
| CL(18:2_20:4_18:2_18:1) | 8,89E+06        | 2,46E+06 | 5,81E+06 | 1,63E+06 | 4,38E+06 | 4,85E+06 | 0,332                          | 0,470  |  |
| CL(74:9)                | 1,71E+06        | 2,92E+05 | 1,40E+06 | 4,77E+05 | 1,07E+06 | 1,18E+06 | 0,195                          | 0,470  |  |
| CL(20:2_18:2_18:2_18:2) | 7,81E+06        | 1,01E+06 | 8,71E+06 | 2,25E+06 | 4,60E+06 | 3,51E+06 | 0,213                          | 0,546  |  |
| CL(20:2_18:2_18:1_18:2) | 4,21E+06        | 4,38E+05 | 3,61E+06 | 6,83E+05 | 2,25E+06 | 2,35E+06 | 0,263                          | 0,540  |  |
| CL(76:10)               | 1,90E+06        | 4,97E+05 | 2,16E+06 | 1,18E+06 | 5,58E+05 | 4,87E+05 | 0,376                          | 0,166  |  |
| CL(80:4)                | 1,88E+06        | 4,02E+05 | 2,21E+06 | 1,21E+06 | 1,05E+06 | 9,83E+05 | 0,498                          | 0,233  |  |
| Cer(d18:1_12:0)         | 3,76E+07        | 3,70E+06 | 3,25E+07 | 7,22E+05 | 3,26E+07 | 2,26E+06 | 0,932                          | 0,928  |  |
| Cer(d18:1_16:0)         | 2,29E+07        | 1,79E+06 | 2,02E+07 | 1,23E+06 | 1,63E+07 | 1,26E+06 | 0,994                          | 0,991  |  |
| Cer(t37:0)              | 2,23E+06        | 2,38E+05 | 2,15E+06 | 2,03E+06 | 1,95E+05 | 2,56E+05 | 0,193                          | 0,000  |  |
| Cer(d18:1_22:0)         | 9,25E+06        | 1,36E+06 | 7,48E+06 | 4,21E+05 | 7,71E+06 | 5,58E+05 | 0,990                          | 0,991  |  |
| Cer(d18:1_23:0)         | 6,31E+06        | 7,08E+05 | 5,54E+06 | 6,09E+05 | 5,38E+06 | 2,88E+04 | 0,980                          | 0,992  |  |
| Cer(d18:1_24:1)         | 1,87E+07        | 4,40E+06 | 1,36E+07 | 5,92E+05 | 1,37E+07 | 1,30E+06 | 0,976                          | 0,986  |  |
| Cer(d18:2_24:0)         | 3,46E+07        | 5,27E+06 | 2,95E+07 | 3,22E+06 | 3,64E+07 | 2,21E+06 | 0,979                          | 0,996  |  |
| Cer(d18:1_24:0)         | 8,54E+07        | 9,83E+06 | 7,45E+07 | 6,26E+06 | 8,79E+07 | 6,01E+06 | 0,948                          | 0,995  |  |

|                       |          |          |          |          |          |          |                       |       |       |
|-----------------------|----------|----------|----------|----------|----------|----------|-----------------------|-------|-------|
| Cer(t16:0_25:0)       | 2,78E+06 | 4,56E+05 | 2,33E+06 | 1,78E+05 | 2,15E+06 | 5,13E+04 | Cer(t16:0_25:0)       | 0,967 | 0,992 |
| Cer(d18:1_25:0)       | 6,69E+07 | 8,36E+06 | 5,55E+07 | 1,82E+06 | 6,34E+07 | 2,62E+06 | Cer(d18:1_25:0)       | 0,250 | 0,896 |
| Cer(d42:1+O)          | 2,12E+06 | 2,07E+05 | 1,87E+06 | 1,54E+05 | 2,03E+06 | 1,91E+05 | Cer(d42:1+O)          | 0,946 | 0,986 |
| Cer(t17:0_25:0)       | 7,75E+06 | 1,16E+06 | 6,63E+06 | 6,86E+05 | 5,76E+06 | 9,47E+04 | Cer(t17:0_25:0)       | 0,981 | 0,997 |
| Cer(d44:2)            | 5,27E+05 | 7,04E+04 | 5,34E+05 | 1,82E+05 | 3,41E+05 | 6,62E+03 | Cer(d44:2)            | 0,894 | 0,972 |
| Cer(t42:0+O)          | 9,85E+05 | 1,38E+05 | 9,63E+05 | 6,51E+04 | 1,11E+06 | 3,63E+05 | Cer(t42:0+O)          | 0,949 | 0,792 |
| DG(36:4e)             | 1,71E+08 | 7,16E+06 | 1,64E+08 | 7,14E+06 | 1,79E+08 | 1,02E+07 | DG(36:4e)             | 0,993 | 0,991 |
| DG(36:3e)             | 7,95E+08 | 8,20E+07 | 8,68E+08 | 6,58E+06 | 1,03E+09 | 1,12E+08 | DG(36:3e)             | 0,976 | 0,947 |
| Hex1Cer(m20:1_18:3)   | 5,60E+06 | 4,55E+05 | 5,37E+06 | 3,02E+05 | 4,07E+06 | 1,54E+05 | Hex1Cer(m20:1_18:3)   | 0,278 | 0,473 |
| Hex1Cer(d18:1_24:0+O) | 1,33E+07 | 2,00E+05 | 1,30E+07 | 8,30E+05 | 6,64E+06 | 3,18E+06 | Hex1Cer(d18:1_24:0+O) | 0,969 | 0,889 |
| LPC(16:0)             | 8,39E+07 | 4,50E+06 | 7,95E+07 | 4,28E+06 | 8,49E+07 | 3,25E+07 | LPC(16:0)             | 0,992 | 0,891 |
| LPC(17:0)             | 1,93E+06 | 1,89E+05 | 1,59E+06 | 3,38E+04 | 2,36E+06 | 8,83E+05 | LPC(17:0)             | 0,975 | 0,897 |
| LPC(18:2)             | 9,04E+06 | 4,19E+05 | 8,56E+06 | 3,03E+05 | 1,96E+07 | 5,40E+06 | LPC(18:2)             | 0,998 | 0,933 |
| LPC(18:0)             | 1,32E+08 | 2,81E+06 | 1,24E+08 | 7,57E+06 | 1,68E+08 | 5,26E+07 | LPC(18:0)             | 0,993 | 0,917 |
| LPC(19:0)             | 9,98E+05 | 6,04E+04 | 9,08E+05 | 1,40E+05 | 1,16E+06 | 3,84E+05 | LPC(19:0)             | 0,946 | 0,907 |
| LPC(20:4)             | 8,22E+06 | 3,02E+05 | 7,27E+06 | 3,54E+05 | 1,97E+07 | 1,46E+07 | LPC(20:4)             | 0,303 | 0,399 |
| LPC(24:0)             | 1,26E+06 | 7,12E+04 | 1,18E+06 | 7,66E+04 | 1,85E+06 | 7,41E+05 | LPC(24:0)             | 0,995 | 0,877 |
| LPE(16:0)             | 2,21E+07 | 1,03E+06 | 2,12E+07 | 9,95E+05 | 8,43E+06 | 3,02E+06 | LPE(16:0)             | 0,993 | 0,900 |
| LPE(18:2)             | 3,16E+06 | 4,07E+04 | 2,90E+06 | 1,78E+05 | 9,18E+06 | 3,11E+06 | LPE(18:2)             | 0,985 | 0,796 |
| LPE(18:1)             | 1,17E+07 | 4,07E+05 | 1,13E+07 | 2,06E+05 | 1,34E+07 | 3,39E+06 | LPE(18:1)             | 0,999 | 0,836 |
| LPE(18:0)             | 3,86E+07 | 1,31E+06 | 3,52E+07 | 2,40E+05 | 1,35E+07 | 3,86E+06 | LPE(18:0)             | 0,995 | 0,905 |
| LPE(20:4)             | 2,52E+07 | 3,47E+05 | 2,39E+07 | 1,11E+06 | 2,54E+08 | 8,28E+07 | LPE(20:4)             | 0,992 | 0,785 |
| LPE(22:6)             | 2,19E+06 | 1,02E+05 | 1,89E+06 | 1,58E+05 | 1,55E+07 | 9,94E+06 | LPE(22:6)             | 0,574 | 0,478 |
| LPE(22:4)             | 8,92E+05 | 2,20E+05 | 6,97E+05 | 4,65E+04 | 1,23E+07 | 4,35E+06 | LPE(22:4)             | 0,990 | 0,771 |
| PC(29:0)              | 4,40E+06 | 2,40E+05 | 4,23E+06 | 2,55E+05 | 6,06E+06 | 7,14E+05 | PC(29:0)              | 0,996 | 0,969 |
| PC(30:1)              | 9,00E+06 | 9,11E+05 | 7,73E+06 | 6,52E+05 | 8,00E+06 | 2,44E+06 | PC(30:1)              | 0,984 | 0,930 |
| PC(16:0_14:0)         | 1,40E+09 | 2,99E+07 | 1,44E+09 | 7,79E+07 | 1,61E+09 | 1,26E+08 | PC(16:0_14:0)         | 0,974 | 0,965 |
| PC(18:1_13:0)         | 3,08E+08 | 1,51E+07 | 2,76E+08 | 5,25E+07 | 2,76E+08 | 1,77E+07 | PC(18:1_13:0)         | 0,963 | 0,975 |
| PC(31:0)              | 2,52E+07 | 2,56E+06 | 2,42E+07 | 3,07E+06 | 3,51E+07 | 3,56E+06 | PC(31:0)              | 0,971 | 0,948 |
| PC(32:3)              | 1,02E+07 | 1,22E+06 | 1,03E+07 | 2,56E+05 | 1,45E+07 | 1,61E+06 | PC(32:3)              | 0,997 | 0,972 |
| PC(32:2)              | 4,99E+07 | 2,97E+06 | 5,03E+07 | 3,73E+06 | 5,69E+07 | 6,44E+06 | PC(32:2)              | 0,983 | 0,964 |
| PC(32:1)              | 3,10E+08 | 7,75E+07 | 2,52E+08 | 2,79E+07 | 2,72E+08 | 3,39E+07 | PC(32:1)              | 0,977 | 0,967 |
| PC(16:0_16:0)         | 1,12E+10 | 4,17E+08 | 1,13E+10 | 7,68E+08 | 1,33E+10 | 9,96E+08 | PC(16:0_16:0)         | 0,990 | 0,988 |

|               |          |          |          |          |          |          |               |       |       |
|---------------|----------|----------|----------|----------|----------|----------|---------------|-------|-------|
| PC(33:3)      | 5,50E+07 | 5,88E+06 | 5,19E+07 | 6,49E+06 | 5,13E+07 | 4,02E+06 | PC(33:3)      | 0,966 | 0,993 |
| PC(33:2)      | 1,33E+08 | 9,55E+06 | 1,27E+08 | 8,80E+06 | 1,50E+08 | 1,53E+07 | PC(33:2)      | 0,984 | 0,989 |
| PC(33:1)      | 2,16E+08 | 8,90E+06 | 2,03E+08 | 1,60E+07 | 2,21E+08 | 2,15E+07 | PC(33:1)      | 0,993 | 0,989 |
| PC(27:0_6:0)  | 2,07E+08 | 4,97E+06 | 2,08E+08 | 7,92E+06 | 2,40E+08 | 8,09E+07 | PC(27:0_6:0)  | 0,994 | 0,922 |
| PC(14:0_20:4) | 5,76E+06 | 1,20E+06 | 5,17E+06 | 7,29E+05 | 6,44E+06 | 6,04E+05 | PC(14:0_20:4) | 0,982 | 0,219 |
| PC(34:4)      | 5,86E+07 | 2,84E+06 | 5,34E+07 | 2,16E+06 | 7,13E+07 | 5,88E+06 | PC(34:4)      | 0,988 | 0,988 |
| PC(34:3)      | 7,78E+07 | 1,34E+07 | 7,30E+07 | 4,14E+06 | 7,24E+07 | 5,56E+06 | PC(34:3)      | 0,995 | 0,983 |
| PC(16:0_18:2) | 1,19E+10 | 2,63E+08 | 1,17E+10 | 9,18E+08 | 1,28E+10 | 6,70E+08 | PC(16:0_18:2) | 0,983 | 0,988 |
| PC(16:0_18:1) | 1,47E+10 | 1,07E+09 | 1,38E+10 | 1,13E+09 | 1,33E+10 | 1,11E+09 | PC(16:0_18:1) | 0,991 | 0,993 |
| PC(15:0_20:4) | 1,45E+08 | 1,21E+07 | 1,44E+08 | 5,95E+06 | 1,81E+08 | 2,28E+07 | PC(15:0_20:4) | 0,989 | 0,976 |
| PC(35:3)      | 3,55E+07 | 2,08E+06 | 3,38E+07 | 3,17E+06 | 3,22E+07 | 3,08E+06 | PC(35:3)      | 0,988 | 0,970 |
| PC(35:2)      | 4,09E+07 | 1,19E+07 | 1,78E+07 | 2,12E+06 | 2,60E+07 | 9,27E+06 | PC(35:2)      | 0,693 | 0,877 |
| PC(36:6)      | 1,36E+07 | 6,76E+05 | 1,33E+07 | 6,71E+05 | 2,22E+07 | 2,44E+06 | PC(36:6)      | 0,990 | 0,979 |
| PC(36:5)      | 2,13E+07 | 7,54E+05 | 2,13E+07 | 4,26E+05 | 2,39E+07 | 1,36E+06 | PC(36:5)      | 0,980 | 0,989 |
| PC(16:1_20:4) | 9,24E+06 | 3,76E+05 | 9,01E+06 | 1,56E+06 | 1,39E+07 | 1,91E+06 | PC(16:1_20:4) | 0,966 | 0,979 |
| PC(36:5)      | 4,58E+07 | 1,34E+06 | 4,42E+07 | 2,38E+06 | 5,04E+07 | 5,94E+06 | PC(36:5)      | 0,994 | 0,976 |
| PC(18:2_18:2) | 2,34E+07 | 2,89E+06 | 2,39E+07 | 1,02E+06 | 2,68E+07 | 3,94E+06 | PC(18:2_18:2) | 0,986 | 0,980 |
| PC(16:0_20:4) | 2,09E+10 | 6,76E+08 | 1,99E+10 | 4,39E+08 | 2,23E+10 | 1,29E+09 | PC(16:0_20:4) | 0,985 | 0,984 |
| PC(18:1_18:2) | 2,61E+09 | 6,96E+07 | 2,47E+09 | 2,06E+08 | 2,56E+09 | 1,95E+08 | PC(18:1_18:2) | 0,994 | 0,993 |
| PC(36:3)      | 2,32E+07 | 3,00E+06 | 2,13E+07 | 3,62E+06 | 2,87E+07 | 6,11E+06 | PC(36:3)      | 0,967 | 0,960 |
| PC(18:0_18:2) | 5,84E+09 | 4,49E+08 | 5,69E+09 | 1,84E+08 | 6,26E+09 | 4,65E+08 | PC(18:0_18:2) | 0,997 | 0,994 |
| PC(36:2)      | 6,60E+07 | 1,26E+07 | 5,10E+07 | 6,37E+06 | 4,91E+07 | 1,01E+07 | PC(36:2)      | 0,948 | 0,945 |
| PC(18:0_18:1) | 2,30E+09 | 1,02E+08 | 1,66E+09 | 1,63E+08 | 1,60E+09 | 5,28E+08 | PC(18:0_18:1) | 0,914 | 0,896 |
| PC(36:0)      | 5,39E+07 | 1,84E+06 | 5,09E+07 | 2,02E+06 | 4,99E+07 | 5,04E+06 | PC(36:0)      | 0,996 | 0,988 |
| PC(37:6)      | 2,76E+07 | 1,83E+06 | 2,76E+07 | 1,52E+06 | 4,49E+07 | 3,47E+06 | PC(37:6)      | 0,992 | 0,989 |
| PC(37:5)      | 2,86E+07 | 9,74E+05 | 2,82E+07 | 2,55E+06 | 2,76E+07 | 1,34E+06 | PC(37:5)      | 0,990 | 0,993 |
| PC(37:4)      | 4,51E+07 | 5,01E+06 | 3,88E+07 | 4,34E+06 | 4,32E+07 | 7,72E+06 | PC(37:4)      | 0,969 | 0,970 |
| PC(17:0_20:4) | 3,43E+08 | 4,77E+07 | 3,23E+08 | 7,47E+07 | 3,87E+08 | 2,26E+07 | PC(17:0_20:4) | 0,959 | 0,930 |
| PC(37:2)      | 2,65E+07 | 1,17E+06 | 3,63E+07 | 9,00E+06 | 2,48E+07 | 2,99E+06 | PC(37:2)      | 0,862 | 0,947 |
| PC(37:1)      | 1,41E+07 | 2,56E+06 | 1,19E+07 | 5,73E+05 | 1,05E+07 | 1,41E+06 | PC(37:1)      | 0,995 | 0,983 |
| PC(38:7)      | 3,81E+07 | 8,96E+05 | 3,62E+07 | 2,43E+06 | 5,02E+07 | 6,39E+06 | PC(38:7)      | 0,994 | 0,983 |
| PC(18:2_20:4) | 7,57E+07 | 5,60E+06 | 7,09E+07 | 5,67E+06 | 1,02E+08 | 7,34E+06 | PC(18:2_20:4) | 0,980 | 0,963 |
| PC(16:0_22:6) | 8,56E+09 | 4,41E+08 | 8,05E+09 | 4,83E+08 | 1,18E+10 | 1,07E+09 | PC(16:0_22:6) | 0,981 | 0,921 |

|                |          |          |          |          |          |          |                |       |       |
|----------------|----------|----------|----------|----------|----------|----------|----------------|-------|-------|
| PC(18:1_20:4)  | 4,23E+09 | 1,68E+08 | 4,16E+09 | 3,23E+08 | 4,85E+09 | 2,12E+08 | PC(18:1_20:4)  | 0,984 | 0,992 |
| PC(18:0_20:4)  | 1,80E+10 | 8,92E+08 | 1,76E+10 | 9,89E+08 | 2,02E+10 | 1,24E+09 | PC(18:0_20:4)  | 0,994 | 0,991 |
| PC(38:3)       | 1,47E+08 | 2,51E+07 | 1,26E+08 | 8,92E+06 | 1,08E+08 | 4,14E+06 | PC(38:3)       | 0,985 | 0,977 |
| PC(18:0_20:3)  | 4,90E+08 | 2,73E+07 | 4,59E+08 | 5,72E+07 | 4,55E+08 | 4,38E+07 | PC(18:0_20:3)  | 0,973 | 0,979 |
| PC(38:2)       | 5,83E+07 | 3,04E+06 | 5,45E+07 | 4,16E+06 | 4,11E+07 | 2,83E+06 | PC(38:2)       | 0,990 | 0,994 |
| PC(38:5D7)     | 8,67E+07 | 1,20E+07 | 9,03E+07 | 7,82E+06 | 0,00E+00 | 0,00E+00 | PC(38:5D7)     | 0,893 |       |
| PC(39:6)       | 3,74E+07 | 1,26E+06 | 3,63E+07 | 2,94E+06 | 5,20E+07 | 3,35E+06 | PC(39:6)       | 0,988 | 0,995 |
| PC(39:5)       | 1,49E+07 | 2,17E+06 | 1,07E+07 | 1,69E+06 | 1,42E+07 | 7,77E+05 | PC(39:5)       | 0,986 | 0,979 |
| PC(39:4)       | 4,29E+07 | 4,08E+06 | 4,05E+07 | 2,96E+06 | 5,45E+07 | 1,06E+07 | PC(39:4)       | 0,989 | 0,952 |
| PC(20:4_20:4)  | 4,44E+08 | 5,55E+07 | 4,51E+08 | 2,55E+07 | 6,47E+08 | 5,54E+07 | PC(20:4_20:4)  | 0,980 | 0,976 |
| PC(40:7)       | 1,73E+07 | 1,08E+06 | 1,65E+07 | 9,30E+05 | 1,89E+07 | 1,76E+06 | PC(40:7)       | 0,987 | 0,984 |
| PC(18:0_22:6)  | 3,09E+08 | 1,71E+07 | 2,81E+08 | 2,37E+07 | 3,21E+08 | 2,38E+07 | PC(18:0_22:6)  | 0,991 | 0,992 |
| PC(40:5)       | 3,90E+08 | 1,64E+07 | 3,75E+08 | 2,66E+07 | 3,96E+08 | 2,19E+07 | PC(40:5)       | 0,992 | 0,997 |
| PC(20:1_20:4)  | 8,34E+07 | 6,15E+06 | 7,63E+07 | 8,90E+06 | 1,24E+08 | 1,19E+07 | PC(20:1_20:4)  | 0,971 | 0,971 |
| PC(40:4)       | 3,61E+07 | 6,85E+06 | 3,83E+07 | 9,75E+06 | 4,67E+07 | 1,97E+07 | PC(40:4)       | 0,752 | 0,893 |
| PC(40:0)       | 1,09E+07 | 5,16E+05 | 1,09E+07 | 4,21E+05 | 1,18E+07 | 1,58E+06 | PC(40:0)       | 0,995 | 0,972 |
| PC(20:4_22:6)  | 1,26E+08 | 8,38E+06 | 1,23E+08 | 1,46E+06 | 1,72E+08 | 1,70E+07 | PC(20:4_22:6)  | 0,993 | 0,981 |
| PC(42:9)       | 4,69E+07 | 5,09E+06 | 4,62E+07 | 3,20E+06 | 5,62E+07 | 8,80E+06 | PC(42:9)       | 0,994 | 0,977 |
| PC(42:8)       | 8,73E+07 | 1,54E+07 | 8,83E+07 | 5,80E+06 | 7,78E+07 | 1,66E+07 | PC(42:8)       | 0,977 | 0,950 |
| PC(42:5)       | 9,55E+06 | 6,75E+05 | 9,08E+06 | 7,03E+05 | 8,88E+06 | 1,56E+06 | PC(42:5)       | 0,993 | 0,961 |
| PC(42:4)       | 1,13E+07 | 5,23E+05 | 1,10E+07 | 7,37E+05 | 8,71E+06 | 7,39E+05 | PC(42:4)       | 0,992 | 0,987 |
| PC(42:2)       | 6,80E+06 | 3,82E+05 | 6,29E+06 | 6,14E+05 | 5,37E+06 | 5,33E+05 | PC(42:2)       | 0,993 | 0,989 |
| PC(34:1_8:0)   | 5,98E+06 | 5,10E+05 | 6,22E+06 | 2,33E+05 | 5,31E+06 | 4,24E+05 | PC(34:1_8:0)   | 0,973 | 0,992 |
| PC(44:12)      | 6,96E+06 | 2,06E+05 | 6,85E+06 | 5,91E+05 | 1,07E+07 | 1,56E+06 | PC(44:12)      | 0,986 | 0,974 |
| PC(44:9)       | 1,70E+07 | 1,36E+06 | 1,74E+07 | 2,68E+06 | 1,52E+07 | 2,73E+06 | PC(44:9)       | 0,976 | 0,968 |
| PC(44:8)       | 3,92E+07 | 6,24E+06 | 3,95E+07 | 5,11E+06 | 2,48E+07 | 5,92E+06 | PC(44:8)       | 0,959 | 0,916 |
| PC(44:4)       | 1,18E+07 | 7,44E+05 | 1,12E+07 | 7,16E+05 | 1,02E+07 | 8,92E+05 | PC(44:4)       | 0,994 | 0,990 |
| PC(46:4)       | 3,51E+06 | 2,82E+05 | 3,31E+06 | 1,27E+05 | 3,15E+06 | 5,56E+05 | PC(46:4)       | 0,989 | 0,972 |
| PC(16:1e_16:0) | 4,89E+07 | 3,61E+06 | 4,56E+07 | 1,69E+06 | 1,30E+07 | 8,75E+06 | PC(16:1e_16:0) | 0,991 | 0,107 |
| PC(32:0e)      | 1,03E+08 | 6,03E+06 | 9,47E+07 | 6,71E+06 | 1,18E+08 | 1,43E+07 | PC(32:0e)      | 0,947 | 0,971 |
| PC(16:1e_18:1) | 1,22E+08 | 4,03E+06 | 1,16E+08 | 1,05E+07 | 3,34E+07 | 2,31E+07 | PC(16:1e_18:1) | 0,988 | 0,038 |
| PC(34:0e)      | 1,86E+07 | 7,22E+05 | 1,79E+07 | 1,06E+06 | 1,93E+07 | 1,62E+06 | PC(34:0e)      | 0,993 | 0,991 |
| PC(16:1e_20:4) | 1,16E+09 | 2,73E+07 | 1,12E+09 | 7,43E+07 | 4,00E+08 | 2,47E+08 | PC(16:1e_20:4) | 0,995 | 0,077 |

|                |          |          |          |          |          |          |                |       |       |
|----------------|----------|----------|----------|----------|----------|----------|----------------|-------|-------|
| PC(18:3e_18:1) | 2,95E+08 | 1,65E+07 | 2,83E+08 | 2,27E+07 | 3,82E+08 | 2,23E+07 | PC(18:3e_18:1) | 0,968 | 0,988 |
| PC(36:3e)      | 1,89E+07 | 9,83E+05 | 1,88E+07 | 1,11E+06 | 1,84E+07 | 1,17E+06 | PC(36:3e)      | 0,983 | 0,987 |
| PC(38:6e)      | 1,62E+08 | 5,58E+06 | 1,43E+08 | 1,33E+07 | 6,66E+07 | 4,76E+07 | PC(38:6e)      | 0,968 | 0,021 |
| PC(38:5e)      | 2,45E+08 | 1,57E+07 | 2,31E+08 | 1,42E+07 | 2,10E+08 | 1,52E+07 | PC(38:5e)      | 0,987 | 0,976 |
| PC(38:4e)      | 4,72E+07 | 1,98E+06 | 4,41E+07 | 2,29E+06 | 6,52E+07 | 1,40E+07 | PC(38:4e)      | 0,996 | 0,951 |
| PC(40:8e)      | 1,20E+07 | 5,61E+05 | 1,16E+07 | 1,46E+06 | 3,71E+06 | 3,87E+06 | PC(40:8e)      | 0,990 | 0,079 |
| PC(40:7e)      | 3,13E+07 | 6,43E+05 | 3,02E+07 | 2,11E+06 | 4,40E+07 | 4,16E+06 | PC(40:7e)      | 0,991 | 0,989 |
| PC(40:6e)      | 2,38E+07 | 1,03E+06 | 2,23E+07 | 1,39E+06 | 3,19E+07 | 2,77E+06 | PC(40:6e)      | 0,986 | 0,994 |
| PE(16:0_16:0)  | 1,72E+07 | 9,47E+05 | 1,71E+07 | 7,81E+05 | 1,75E+07 | 1,49E+06 | PE(16:0_16:0)  | 0,970 | 0,982 |
| PE(16:1_18:2)  | 5,11E+06 | 2,26E+05 | 4,54E+06 | 2,71E+05 | 5,73E+06 | 8,94E+05 | PE(16:1_18:2)  | 0,995 | 0,976 |
| PE(16:0_18:3)  | 1,51E+06 | 3,11E+05 | 1,37E+06 | 9,06E+04 | 1,56E+06 | 1,16E+05 | PE(16:0_18:3)  | 0,954 | 0,975 |
| PE(16:0_18:2)  | 1,41E+08 | 5,13E+06 | 1,24E+08 | 4,74E+06 | 1,52E+08 | 8,27E+06 | PE(16:0_18:2)  | 0,997 | 0,995 |
| PE(16:0_18:1)  | 1,18E+08 | 2,32E+06 | 1,11E+08 | 3,86E+06 | 1,00E+08 | 8,92E+06 | PE(16:0_18:1)  | 0,994 | 0,978 |
| PE(18:0_16:0)  | 6,23E+06 | 1,41E+06 | 7,04E+06 | 5,80E+05 | 6,87E+06 | 5,79E+05 | PE(18:0_16:0)  | 0,952 | 0,979 |
| PE(15:0_20:4)  | 1,45E+06 | 1,19E+05 | 1,15E+06 | 2,62E+04 | 1,74E+06 | 1,70E+05 | PE(15:0_20:4)  | 0,965 | 0,971 |
| PE(17:0_18:2)  | 4,66E+06 | 2,02E+05 | 4,18E+06 | 3,22E+05 | 4,51E+06 | 2,24E+05 | PE(17:0_18:2)  | 0,988 | 0,988 |
| PE(16:1_20:4)  | 3,41E+07 | 7,53E+05 | 3,09E+07 | 2,24E+06 | 3,46E+07 | 3,09E+06 | PE(16:1_20:4)  | 0,990 | 0,990 |
| PE(16:0_20:5)  | 1,02E+07 | 4,04E+05 | 8,99E+06 | 7,26E+05 | 1,22E+07 | 5,86E+05 | PE(16:0_20:5)  | 0,991 | 0,976 |
| PE(16:0_20:4)  | 9,22E+08 | 2,00E+07 | 8,90E+08 | 1,99E+07 | 1,06E+09 | 6,41E+07 | PE(16:0_20:4)  | 0,982 | 0,973 |
| PE(18:1_18:2)  | 1,19E+08 | 3,01E+06 | 1,13E+08 | 7,03E+06 | 1,27E+08 | 1,19E+07 | PE(18:1_18:2)  | 0,994 | 0,987 |
| PE(16:0_20:3)  | 1,93E+07 | 1,05E+06 | 1,80E+07 | 1,18E+06 | 1,88E+07 | 1,40E+06 | PE(16:0_20:3)  | 0,972 | 0,990 |
| PE(36:2)       | 2,74E+07 | 8,12E+05 | 2,66E+07 | 2,00E+06 | 2,97E+07 | 9,84E+05 | PE(36:2)       | 0,952 | 0,937 |
| PE(18:1_18:1)  | 4,78E+07 | 3,62E+06 | 4,84E+07 | 8,62E+06 | 3,24E+07 | 8,58E+06 | PE(18:1_18:1)  | 0,891 | 0,580 |
| PE(18:0_18:2)  | 2,42E+08 | 9,28E+06 | 2,26E+08 | 1,83E+07 | 2,56E+08 | 2,06E+07 | PE(18:0_18:2)  | 0,992 | 0,989 |
| PE(36:1)       | 4,06E+07 | 1,80E+06 | 3,50E+07 | 4,22E+06 | 3,77E+07 | 3,05E+06 | PE(36:1)       | 0,972 | 0,942 |
| PE(18:0_18:1)  | 7,63E+07 | 3,75E+06 | 7,20E+07 | 6,04E+06 | 6,18E+07 | 5,63E+06 | PE(18:0_18:1)  | 0,989 | 0,983 |
| PE(36:0)       | 2,99E+06 | 2,32E+05 | 2,77E+06 | 2,18E+05 | 3,48E+06 | 2,12E+05 | PE(36:0)       | 0,991 | 0,986 |
| PE(17:1_20:4)  | 2,82E+06 | 2,48E+05 | 2,80E+06 | 2,91E+05 | 3,09E+06 | 2,64E+05 | PE(17:1_20:4)  | 0,966 | 0,974 |
| PE(17:0_20:4)  | 3,95E+07 | 1,87E+06 | 3,79E+07 | 2,91E+06 | 4,54E+07 | 2,72E+06 | PE(17:0_20:4)  | 0,985 | 0,989 |
| PE(18:3_20:4)  | 4,75E+06 | 3,05E+05 | 4,36E+06 | 1,31E+05 | 5,19E+06 | 1,89E+05 | PE(18:3_20:4)  | 0,996 | 0,996 |
| PE(16:1_22:6)  | 2,08E+06 | 5,91E+05 | 1,98E+06 | 9,05E+05 | 2,91E+06 | 4,82E+05 | PE(16:1_22:6)  | 0,721 | 0,823 |
| PE(18:2_20:4)  | 1,12E+08 | 4,86E+06 | 1,04E+08 | 4,91E+06 | 1,20E+08 | 6,52E+06 | PE(18:2_20:4)  | 0,989 | 0,982 |
| PE(16:0_22:6)  | 2,01E+08 | 7,82E+06 | 1,86E+08 | 2,99E+06 | 2,46E+08 | 1,89E+07 | PE(16:0_22:6)  | 0,988 | 0,976 |

|                |          |          |          |          |          |          |                |       |       |
|----------------|----------|----------|----------|----------|----------|----------|----------------|-------|-------|
| PE(18:1_20:4)  | 6,72E+08 | 2,88E+07 | 6,58E+08 | 1,08E+07 | 7,24E+08 | 4,84E+07 | PE(18:1_20:4)  | 0,982 | 0,989 |
| PE(16:0_22:5)  | 4,77E+07 | 8,00E+06 | 4,65E+07 | 3,01E+06 | 5,77E+07 | 4,36E+06 | PE(16:0_22:5)  | 0,989 | 0,990 |
| PE(38:4)       | 2,53E+06 | 6,31E+04 | 2,42E+06 | 1,34E+05 | 2,59E+06 | 3,41E+04 | PE(38:4)       | 0,996 | 0,989 |
| PE(18:0_20:4)  | 1,96E+09 | 1,46E+08 | 1,89E+09 | 2,34E+07 | 2,19E+09 | 9,89E+07 | PE(18:0_20:4)  | 0,972 | 0,949 |
| PE(38:3)       | 3,25E+06 | 2,15E+05 | 2,85E+06 | 3,45E+05 | 2,61E+06 | 1,04E+05 | PE(38:3)       | 0,909 | 0,982 |
| PE(18:0_20:3)  | 3,53E+07 | 1,29E+06 | 3,26E+07 | 2,05E+06 | 3,08E+07 | 2,49E+06 | PE(18:0_20:3)  | 0,990 | 0,983 |
| PE(18:0_20:2)  | 1,47E+07 | 5,17E+05 | 1,37E+07 | 9,17E+05 | 1,54E+07 | 1,06E+06 | PE(18:0_20:2)  | 0,990 | 0,993 |
| PE(38:1)       | 6,27E+06 | 1,27E+06 | 6,25E+06 | 3,31E+05 | 4,06E+06 | 1,61E+06 | PE(38:1)       | 0,926 | 0,888 |
| PE(17:0_22:6)  | 3,08E+06 | 1,10E+05 | 2,95E+06 | 1,81E+05 | 4,15E+06 | 2,93E+05 | PE(17:0_22:6)  | 0,985 | 0,993 |
| PE(19:0_20:4)  | 1,04E+07 | 6,50E+05 | 9,58E+06 | 5,90E+05 | 1,05E+07 | 1,09E+06 | PE(19:0_20:4)  | 0,991 | 0,969 |
| PE(20:4_20:4)  | 2,25E+07 | 1,22E+06 | 2,08E+07 | 1,93E+06 | 2,67E+07 | 1,63E+06 | PE(20:4_20:4)  | 0,989 | 0,993 |
| PE(18:1_22:6)  | 2,60E+07 | 9,58E+05 | 2,45E+07 | 7,93E+05 | 3,66E+07 | 1,79E+06 | PE(18:1_22:6)  | 0,950 | 0,953 |
| PE(40:6)       | 5,77E+06 | 1,50E+05 | 5,43E+06 | 7,46E+05 | 7,16E+06 | 9,99E+05 | PE(40:6)       | 0,959 | 0,948 |
| PE(20:2_20:4)  | 6,85E+06 | 3,98E+05 | 6,18E+06 | 1,86E+05 | 6,57E+06 | 5,23E+05 | PE(20:2_20:4)  | 0,978 | 0,992 |
| PE(18:1_22:5)  | 6,65E+06 | 3,27E+05 | 6,13E+06 | 5,06E+05 | 7,59E+06 | 1,19E+06 | PE(18:1_22:5)  | 0,977 | 0,951 |
| PE(18:0_22:6)  | 3,81E+07 | 1,94E+06 | 3,62E+07 | 1,93E+06 | 4,46E+07 | 1,48E+06 | PE(18:0_22:6)  | 0,985 | 0,986 |
| PE(40:5)       | 6,39E+06 | 1,76E+05 | 5,98E+06 | 5,54E+05 | 7,67E+06 | 1,16E+06 | PE(40:5)       | 0,904 | 0,893 |
| PE(18:1_22:4)  | 9,77E+06 | 6,37E+05 | 9,63E+06 | 8,56E+05 | 9,35E+06 | 8,62E+05 | PE(18:1_22:4)  | 0,943 | 0,971 |
| PE(20:1_20:4)  | 2,13E+07 | 6,84E+05 | 2,02E+07 | 1,58E+06 | 1,98E+07 | 1,15E+06 | PE(20:1_20:4)  | 0,987 | 0,986 |
| PE(18:0_22:5)  | 1,14E+07 | 1,31E+06 | 1,07E+07 | 1,17E+06 | 2,90E+07 | 1,07E+07 | PE(18:0_22:5)  | 0,976 | 0,872 |
| PE(40:4)       | 2,98E+07 | 7,37E+05 | 2,90E+07 | 8,79E+05 | 3,33E+07 | 1,90E+06 | PE(40:4)       | 0,984 | 0,983 |
| PE(18:0_22:4)  | 5,14E+07 | 1,65E+06 | 4,83E+07 | 5,45E+06 | 4,25E+07 | 3,07E+06 | PE(18:0_22:4)  | 0,981 | 0,984 |
| PE(20:0_20:4)  | 1,39E+07 | 3,28E+06 | 1,32E+07 | 3,95E+06 | 1,24E+07 | 2,05E+06 | PE(20:0_20:4)  | 0,911 | 0,694 |
| PE(18:1_22:0)  | 1,25E+06 | 5,89E+04 | 1,12E+06 | 1,08E+05 | 7,57E+05 | 9,74E+04 | PE(18:1_22:0)  | 0,979 | 0,963 |
| PE(20:4_22:6)  | 3,25E+06 | 1,11E+05 | 3,03E+06 | 2,22E+05 | 4,07E+06 | 3,34E+05 | PE(20:4_22:6)  | 0,973 | 0,979 |
| PE(24:0_20:4)  | 1,28E+06 | 1,13E+05 | 1,12E+06 | 1,31E+05 | 1,50E+06 | 4,87E+05 | PE(24:0_20:4)  | 0,968 | 0,913 |
| PE(54:5)       | 1,03E+06 | 1,56E+05 | 8,10E+05 | 9,86E+04 | 0,00E+00 | 0,00E+00 | PE(54:5)       | 0,974 |       |
| PE(32:2e)      | 1,66E+06 | 8,80E+04 | 1,51E+06 | 8,87E+04 | 2,15E+05 | 3,43E+05 | PE(32:2e)      | 0,987 | 0,096 |
| PE(16:1e_18:2) | 2,53E+07 | 7,50E+05 | 2,34E+07 | 9,12E+05 | 4,47E+06 | 5,28E+06 | PE(16:1e_18:2) | 0,985 | 0,348 |
| PE(16:1e_18:1) | 4,21E+07 | 5,14E+06 | 4,02E+07 | 5,04E+06 | 5,75E+06 | 5,19E+06 | PE(16:1e_18:1) | 0,980 | 0,478 |
| PE(36:6e)      | 5,52E+06 | 2,02E+05 | 5,01E+06 | 3,38E+05 | 8,37E+05 | 1,18E+06 | PE(36:6e)      | 0,967 | 0,306 |
| PE(36:5e)      | 3,01E+06 | 1,51E+05 | 2,39E+06 | 4,89E+05 | 2,67E+05 | 1,96E+05 | PE(36:5e)      | 0,863 | 0,743 |
| PE(16:1e_20:4) | 6,72E+08 | 4,16E+07 | 6,24E+08 | 5,14E+07 | 1,19E+08 | 1,10E+08 | PE(16:1e_20:4) | 0,971 | 0,409 |

|                |          |          |          |          |          |          |                |       |       |
|----------------|----------|----------|----------|----------|----------|----------|----------------|-------|-------|
| PE(16:0e_20:4) | 3,01E+07 | 1,13E+06 | 2,83E+07 | 9,28E+05 | 3,21E+07 | 2,35E+06 | PE(16:0e_20:4) | 0,992 | 0,990 |
| PE(18:2e_18:2) | 8,73E+06 | 3,01E+05 | 8,77E+06 | 7,86E+05 | 2,49E+06 | 2,32E+06 | PE(18:2e_18:2) | 0,934 | 0,039 |
| PE(36:4e)      | 5,63E+06 | 1,56E+05 | 4,44E+06 | 6,13E+05 | 1,15E+06 | 1,02E+06 | PE(36:4e)      | 0,975 | 0,223 |
| PE(18:1e_18:2) | 1,69E+07 | 3,09E+06 | 1,52E+07 | 2,28E+06 | 3,87E+06 | 3,75E+06 | PE(18:1e_18:2) | 0,960 | 0,192 |
| PE(36:2e)      | 2,81E+06 | 1,17E+05 | 2,77E+06 | 2,72E+05 | 3,35E+06 | 2,32E+05 | PE(36:2e)      | 0,959 | 0,983 |
| PE(18:3e_20:4) | 9,27E+07 | 1,80E+06 | 9,01E+07 | 5,96E+06 | 1,92E+07 | 1,89E+07 | PE(18:3e_20:4) | 0,952 | 0,309 |
| PE(16:1e_22:6) | 7,05E+07 | 3,38E+06 | 6,35E+07 | 3,86E+06 | 1,48E+07 | 1,55E+07 | PE(16:1e_22:6) | 0,994 | 0,313 |
| PE(38:6e)      | 7,32E+06 | 7,92E+05 | 6,82E+06 | 4,50E+05 | 8,69E+06 | 5,56E+05 | PE(38:6e)      | 0,989 | 0,991 |
| PE(18:2e_20:4) | 3,39E+08 | 1,00E+07 | 3,20E+08 | 1,66E+07 | 6,38E+07 | 6,14E+07 | PE(18:2e_20:4) | 0,988 | 0,325 |
| PE(38:6e)      | 1,30E+07 | 2,32E+06 | 1,34E+07 | 1,16E+06 | 1,69E+06 | 1,81E+06 | PE(38:6e)      | 0,971 | 0,454 |
| PE(38:5e)      | 2,39E+06 | 1,72E+05 | 2,38E+06 | 2,06E+05 | 4,24E+05 | 5,12E+05 | PE(38:5e)      | 0,980 | 0,242 |
| PE(18:1e_20:4) | 2,39E+07 | 1,11E+06 | 2,30E+07 | 1,21E+06 | 2,50E+07 | 1,32E+06 | PE(18:1e_20:4) | 0,983 | 0,991 |
| PE(16:1e_22:4) | 6,19E+07 | 1,53E+06 | 5,38E+07 | 8,69E+06 | 1,03E+07 | 1,06E+07 | PE(16:1e_22:4) | 0,970 | 0,210 |
| PE(38:5e)      | 3,79E+06 | 2,69E+05 | 3,64E+06 | 3,87E+05 | 5,54E+05 | 6,19E+05 | PE(38:5e)      | 0,979 | 0,535 |
| PE(18:1e_20:4) | 6,19E+08 | 1,48E+07 | 5,81E+08 | 4,54E+07 | 1,07E+08 | 1,08E+08 | PE(18:1e_20:4) | 0,979 | 0,215 |
| PE(38:4e)      | 4,36E+06 | 2,14E+05 | 4,19E+06 | 3,99E+05 | 3,93E+06 | 3,07E+05 | PE(38:4e)      | 0,990 | 0,985 |
| PE(18:0e_20:4) | 3,18E+07 | 1,17E+06 | 2,97E+07 | 1,59E+06 | 3,22E+07 | 2,41E+06 | PE(18:0e_20:4) | 0,988 | 0,991 |
| PE(40:9e)      | 2,82E+06 | 1,26E+05 | 2,48E+06 | 2,03E+05 | 4,96E+05 | 6,73E+05 | PE(40:9e)      | 0,959 | 0,001 |
| PE(18:2e_22:6) | 1,72E+07 | 7,75E+05 | 1,61E+07 | 8,82E+05 | 3,56E+06 | 3,49E+06 | PE(18:2e_22:6) | 0,996 | 0,308 |
| PE(18:1e_22:6) | 3,42E+07 | 1,12E+06 | 3,09E+07 | 4,02E+06 | 7,13E+06 | 7,58E+06 | PE(18:1e_22:6) | 0,980 | 0,213 |
| PE(18:2e_22:4) | 1,35E+07 | 2,06E+06 | 9,62E+06 | 7,43E+05 | 2,18E+06 | 1,99E+06 | PE(18:2e_22:4) | 0,804 | 0,001 |
| PE(40:6e)      | 9,11E+06 | 1,05E+06 | 8,47E+06 | 1,56E+06 | 1,31E+06 | 1,24E+06 | PE(40:6e)      | 0,914 | 0,435 |
| PE(18:1e_22:4) | 2,07E+07 | 4,94E+06 | 1,98E+07 | 6,95E+06 | 3,04E+06 | 2,87E+06 | PE(18:1e_22:4) | 0,894 | 0,326 |
| PE(20:1e_20:4) | 1,18E+07 | 2,94E+06 | 1,20E+07 | 3,46E+06 | 1,34E+06 | 1,07E+06 | PE(20:1e_20:4) | 0,918 | 0,608 |
| PG(16:0_16:0)  | 5,10E+06 | 4,79E+05 | 3,84E+06 | 9,78E+05 | 2,70E+06 | 1,04E+06 | PG(16:0_16:0)  | 0,877 | 0,825 |
| PG(16:0_18:2)  | 2,86E+05 | 7,02E+04 | 2,45E+05 | 2,16E+04 | 1,31E+05 | 1,65E+04 | PG(16:0_18:2)  | 0,810 | 0,568 |
| PG(16:0_18:2)  | 9,41E+06 | 4,13E+05 | 8,67E+06 | 1,18E+06 | 5,82E+06 | 1,12E+06 | PG(16:0_18:2)  | 0,977 | 0,944 |
| PG(16:0_18:1)  | 9,44E+07 | 2,64E+06 | 9,10E+07 | 3,51E+06 | 4,82E+07 | 6,30E+06 | PG(16:0_18:1)  | 0,980 | 0,960 |
| PG(18:2_18:2)  | 1,77E+06 | 1,95E+05 | 1,68E+06 | 1,50E+05 | 9,55E+05 | 2,09E+05 | PG(18:2_18:2)  | 0,976 | 0,936 |
| PG(16:0_20:4)  | 2,28E+06 | 2,36E+05 | 1,83E+06 | 2,54E+05 | 2,09E+06 | 6,15E+05 | PG(16:0_20:4)  | 0,964 | 0,921 |
| PG(18:1_18:2)  | 1,87E+06 | 9,15E+04 | 1,91E+06 | 1,71E+05 | 1,68E+06 | 3,01E+05 | PG(18:1_18:2)  | 0,988 | 0,970 |
| PG(16:0_20:2)  | 6,95E+06 | 7,48E+05 | 6,64E+06 | 2,48E+05 | 4,86E+06 | 1,55E+06 | PG(16:0_20:2)  | 0,948 | 0,892 |
| PG(18:0_18:2)  | 3,65E+06 | 2,81E+05 | 3,39E+06 | 5,85E+05 | 2,89E+06 | 8,02E+05 | PG(18:0_18:2)  | 0,947 | 0,924 |

|               |          |          |          |          |          |          |               |       |       |
|---------------|----------|----------|----------|----------|----------|----------|---------------|-------|-------|
| PG(18:2_20:4) | 2,70E+06 | 9,69E+04 | 2,84E+06 | 7,54E+05 | 2,02E+06 | 2,67E+05 | PG(18:2_20:4) | 0,902 | 0,930 |
| PG(18:2_22:6) | 6,21E+06 | 6,70E+05 | 5,11E+06 | 2,27E+05 | 5,57E+06 | 1,23E+06 | PG(18:2_22:6) | 0,971 | 0,953 |
| PG(22:5_18:2) | 2,15E+06 | 9,96E+04 | 2,03E+06 | 1,01E+05 | 1,83E+06 | 3,28E+05 | PG(22:5_18:2) | 0,995 | 0,964 |
| PG(20:4_22:6) | 6,87E+06 | 8,28E+05 | 6,14E+06 | 4,70E+05 | 7,10E+06 | 2,93E+06 | PG(20:4_22:6) | 0,910 | 0,759 |
| PG(22:6_22:6) | 1,23E+07 | 1,12E+06 | 1,13E+07 | 7,73E+05 | 1,21E+07 | 2,03E+06 | PG(22:6_22:6) | 0,990 | 0,967 |
| PG(22:5_22:6) | 6,51E+06 | 4,86E+05 | 6,22E+06 | 5,98E+05 | 6,45E+06 | 6,75E+05 | PG(22:5_22:6) | 0,989 | 0,981 |
| PG(22:5_22:5) | 1,45E+06 | 1,28E+05 | 1,27E+06 | 9,05E+04 | 1,52E+06 | 1,03E+05 | PG(22:5_22:5) | 0,985 | 0,950 |
| PI(16:0_16:0) | 2,06E+07 | 2,78E+06 | 1,95E+07 | 4,20E+06 | 1,53E+07 | 1,00E+07 | PI(16:0_16:0) | 0,869 | 0,797 |
| PI(16:0_18:2) | 1,66E+07 | 8,55E+05 | 1,60E+07 | 2,02E+06 | 1,04E+07 | 5,39E+06 | PI(16:0_18:2) | 0,977 | 0,843 |
| PI(16:0_18:1) | 5,86E+05 | 1,33E+05 | 4,36E+05 | 9,05E+04 | 2,25E+06 | 3,23E+06 | PI(16:0_18:1) | 0,950 | 0,059 |
| PI(16:0_18:1) | 1,01E+07 | 8,79E+05 | 8,91E+06 | 1,56E+06 | 8,39E+06 | 6,75E+06 | PI(16:0_18:1) | 0,722 | 0,714 |
| PI(18:0_16:0) | 1,23E+07 | 7,78E+05 | 1,28E+07 | 2,38E+06 | 7,86E+06 | 5,63E+06 | PI(18:0_16:0) | 0,837 | 0,802 |
| PI(16:0_20:4) | 9,75E+07 | 6,71E+06 | 8,46E+07 | 4,98E+06 | 7,25E+07 | 4,08E+07 | PI(16:0_20:4) | 0,975 | 0,828 |
| PI(18:1_18:2) | 3,61E+06 | 2,11E+05 | 3,31E+06 | 3,71E+05 | 2,39E+06 | 1,24E+06 | PI(18:1_18:2) | 0,955 | 0,845 |
| PI(16:0_20:3) | 4,81E+06 | 3,65E+05 | 4,33E+06 | 8,43E+05 | 3,48E+06 | 1,76E+06 | PI(16:0_20:3) | 0,964 | 0,850 |
| PI(18:0_18:2) | 2,29E+07 | 1,06E+06 | 2,13E+07 | 2,50E+06 | 1,34E+07 | 8,00E+06 | PI(18:0_18:2) | 0,949 | 0,820 |
| PI(18:0_18:1) | 5,20E+06 | 5,76E+05 | 5,12E+06 | 1,72E+06 | 2,80E+06 | 1,65E+06 | PI(18:0_18:1) | 0,821 | 0,722 |
| PI(17:0_20:4) | 7,41E+06 | 2,59E+05 | 6,96E+06 | 7,08E+05 | 5,06E+06 | 2,75E+06 | PI(17:0_20:4) | 0,975 | 0,845 |
| PI(18:2_20:4) | 2,09E+06 | 1,73E+05 | 1,96E+06 | 1,83E+05 | 1,66E+06 | 9,08E+05 | PI(18:2_20:4) | 0,993 | 0,863 |
| PI(16:0_22:6) | 1,29E+07 | 1,07E+06 | 1,20E+07 | 1,56E+06 | 1,26E+07 | 6,61E+06 | PI(16:0_22:6) | 0,974 | 0,853 |
| PI(18:1_20:4) | 2,72E+07 | 1,22E+06 | 2,56E+07 | 2,51E+06 | 2,14E+07 | 1,07E+07 | PI(18:1_20:4) | 0,980 | 0,866 |
| PI(18:0_20:4) | 6,14E+08 | 7,07E+07 | 5,90E+08 | 6,53E+07 | 4,51E+08 | 2,64E+08 | PI(18:0_20:4) | 0,984 | 0,809 |
| PI(18:0_20:3) | 3,13E+07 | 1,89E+06 | 3,03E+07 | 4,61E+06 | 1,86E+07 | 1,12E+07 | PI(18:0_20:3) | 0,960 | 0,819 |
| PI(18:0_22:6) | 7,98E+06 | 5,09E+05 | 7,41E+06 | 1,03E+06 | 7,31E+06 | 4,44E+06 | PI(18:0_22:6) | 0,967 | 0,823 |
| PI(18:0_22:4) | 6,37E+06 | 3,52E+05 | 5,67E+06 | 8,67E+05 | 4,00E+06 | 2,44E+06 | PI(18:0_22:4) | 0,952 | 0,831 |
| PS(16:0_18:2) | 4,26E+06 | 2,08E+05 | 4,36E+06 | 2,10E+06 | 1,92E+06 | 1,90E+06 | PS(16:0_18:2) | 0,819 | 0,712 |
| PS(16:0_18:1) | 1,23E+07 | 1,82E+06 | 1,15E+07 | 5,12E+06 | 2,78E+06 | 4,39E+06 | PS(16:0_18:1) | 0,749 | 0,523 |
| PS(35:1)      | 5,18E+06 | 1,00E+06 | 5,25E+06 | 4,18E+05 | 6,55E+06 | 2,60E+05 | PS(35:1)      | 0,970 | 0,994 |
| PS(16:0_20:4) | 9,53E+07 | 4,47E+06 | 9,28E+07 | 3,24E+07 | 5,68E+07 | 4,98E+07 | PS(16:0_20:4) | 0,899 | 0,739 |
| PS(18:1_18:1) | 2,46E+06 | 2,11E+05 | 2,19E+06 | 8,93E+05 | 7,10E+05 | 9,43E+05 | PS(18:1_18:1) | 0,792 | 0,626 |
| PS(18:0_18:2) | 3,85E+07 | 4,23E+06 | 3,22E+07 | 1,52E+07 | 1,75E+07 | 1,36E+07 | PS(18:0_18:2) | 0,698 | 0,722 |
| PS(18:0_18:1) | 1,49E+07 | 2,72E+06 | 1,47E+07 | 6,52E+06 | 5,76E+06 | 3,15E+06 | PS(18:0_18:1) | 0,614 | 0,683 |
| PS(38:7e)     | 8,15E+06 | 1,60E+06 | 6,08E+06 | 3,70E+05 | 1,49E+06 | 1,65E+06 | PS(38:7e)     | 0,962 | 0,325 |



|                |          |          |          |          |          |          |                |       |       |
|----------------|----------|----------|----------|----------|----------|----------|----------------|-------|-------|
| PS(37:4)       | 4,45E+06 | 1,35E+05 | 4,01E+06 | 1,44E+06 | 2,29E+06 | 2,37E+06 | PS(37:4)       | 0,877 | 0,694 |
| PS(16:0_22:6)  | 5,94E+06 | 2,95E+05 | 6,05E+06 | 2,09E+06 | 3,99E+06 | 3,25E+06 | PS(16:0_22:6)  | 0,893 | 0,740 |
| PS(18:0_20:4)  | 5,13E+08 | 2,68E+07 | 5,00E+08 | 1,75E+08 | 2,58E+08 | 2,44E+08 | PS(18:0_20:4)  | 0,742 | 0,666 |
| PS(18:0_20:3)  | 8,76E+06 | 3,75E+05 | 9,03E+06 | 4,99E+06 | 3,38E+06 | 3,29E+06 | PS(18:0_20:3)  | 0,823 | 0,606 |
| PS(40:8e)      | 4,06E+06 | 9,92E+05 | 2,98E+06 | 1,14E+05 | 6,43E+05 | 9,07E+05 | PS(40:8e)      | 0,980 | 0,166 |
| PS(40:7e)      | 7,87E+06 | 1,68E+06 | 6,33E+06 | 7,28E+05 | 1,53E+06 | 1,74E+06 | PS(40:7e)      | 0,932 | 0,259 |
| PS(18:0_22:6)  | 1,08E+07 | 7,89E+05 | 1,07E+07 | 4,48E+06 | 5,97E+06 | 5,35E+06 | PS(18:0_22:6)  | 0,819 | 0,703 |
| PS(40:6)       | 2,63E+07 | 5,24E+06 | 2,12E+07 | 8,41E+05 | 2,87E+07 | 1,31E+06 | PS(40:6)       | 0,961 | 0,935 |
| PS(40:5)       | 3,29E+06 | 6,45E+05 | 3,88E+06 | 2,63E+06 | 1,86E+06 | 1,84E+06 | PS(40:5)       | 0,601 | 0,720 |
| PS(18:0_22:4)  | 1,81E+07 | 3,21E+06 | 1,95E+07 | 1,10E+07 | 6,65E+06 | 6,16E+06 | PS(18:0_22:4)  | 0,620 | 0,668 |
| SM(d30:1)      | 8,05E+07 | 2,18E+06 | 8,05E+07 | 1,69E+06 | 7,14E+07 | 1,54E+07 | SM(d30:1)      | 0,864 | 0,195 |
| SM(d32:1)      | 9,26E+06 | 4,68E+05 | 9,10E+06 | 3,25E+05 | 1,04E+07 | 2,69E+06 | SM(d32:1)      | 0,988 | 0,933 |
| SM(d33:1)      | 3,17E+07 | 9,31E+05 | 3,07E+07 | 1,25E+06 | 3,64E+07 | 9,33E+06 | SM(d33:1)      | 0,995 | 0,932 |
| SM(d34:2)      | 1,61E+08 | 9,41E+06 | 1,60E+08 | 7,11E+06 | 2,23E+08 | 4,24E+07 | SM(d34:2)      | 0,995 | 0,962 |
| SM(d17:1_17:1) | 3,41E+07 | 1,65E+06 | 3,36E+07 | 1,53E+06 | 4,58E+07 | 1,09E+07 | SM(d17:1_17:1) | 0,953 | 0,953 |
| SM(d34:1)      | 5,43E+09 | 1,95E+08 | 5,50E+09 | 1,58E+08 | 5,87E+09 | 1,24E+09 | SM(d34:1)      | 0,998 | 0,956 |
| SM(d34:0)      | 1,48E+08 | 5,17E+06 | 1,45E+08 | 7,66E+06 | 1,54E+08 | 3,47E+07 | SM(d34:0)      | 0,982 | 0,943 |
| SM(d35:1)      | 9,28E+07 | 1,47E+06 | 9,04E+07 | 6,73E+06 | 9,12E+07 | 1,90E+07 | SM(d35:1)      | 0,991 | 0,965 |
| SM(t34:1)      | 7,32E+06 | 2,72E+05 | 7,32E+06 | 3,85E+05 | 6,00E+06 | 2,58E+06 | SM(t34:1)      | 0,992 | 0,877 |
| SM(t34:0)      | 5,67E+06 | 2,93E+05 | 5,28E+06 | 4,29E+05 | 6,69E+06 | 2,87E+06 | SM(t34:0)      | 0,994 | 0,866 |
| SM(d36:2)      | 1,51E+08 | 1,05E+07 | 1,46E+08 | 6,14E+06 | 1,41E+08 | 1,98E+07 | SM(d36:2)      | 0,986 | 0,974 |
| SM(d20:1_16:1) | 1,01E+07 | 1,15E+06 | 9,42E+06 | 1,62E+06 | 9,42E+06 | 3,16E+06 | SM(d20:1_16:1) | 0,978 | 0,905 |
| SM(d36:1)      | 3,81E+08 | 1,12E+07 | 3,63E+08 | 1,98E+07 | 3,46E+08 | 8,10E+07 | SM(d36:1)      | 0,993 | 0,936 |
| SM(d37:1)      | 1,47E+07 | 7,92E+05 | 1,43E+07 | 4,11E+05 | 1,38E+07 | 3,03E+06 | SM(d37:1)      | 0,996 | 0,957 |
| SM(t36:0)      | 8,75E+06 | 3,89E+05 | 8,74E+06 | 6,13E+05 | 1,05E+07 | 4,86E+06 | SM(t36:0)      | 0,995 | 0,877 |
| SM(d38:2)      | 4,98E+07 | 3,04E+06 | 4,98E+07 | 2,01E+06 | 4,59E+07 | 7,32E+06 | SM(d38:2)      | 0,993 | 0,971 |
| SM(d38:1)      | 3,28E+08 | 1,86E+07 | 3,18E+08 | 1,34E+07 | 2,64E+08 | 5,83E+07 | SM(d38:1)      | 0,988 | 0,937 |
| SM(d39:1)      | 2,32E+07 | 6,71E+05 | 2,19E+07 | 7,89E+05 | 2,08E+07 | 4,87E+06 | SM(d39:1)      | 0,997 | 0,951 |
| SM(t38:1)      | 8,45E+06 | 4,77E+05 | 7,83E+06 | 5,18E+05 | 8,84E+06 | 3,99E+06 | SM(t38:1)      | 0,994 | 0,879 |
| SM(t38:0)      | 5,51E+07 | 1,84E+06 | 5,00E+07 | 4,69E+06 | 6,60E+07 | 3,61E+07 | SM(t38:0)      | 0,985 | 0,860 |
| SM(d40:2)      | 1,71E+08 | 4,93E+06 | 1,72E+08 | 1,50E+07 | 2,01E+08 | 4,50E+07 | SM(d40:2)      | 0,980 | 0,941 |
| SM(d40:1)      | 6,92E+08 | 2,53E+07 | 6,04E+08 | 1,06E+08 | 6,15E+08 | 1,34E+08 | SM(d40:1)      | 0,956 | 0,915 |
| SM(d40:0)      | 1,06E+07 | 4,38E+05 | 1,00E+07 | 6,78E+05 | 9,36E+06 | 2,03E+06 | SM(d40:0)      | 0,991 | 0,951 |

|                    |          |          |          |          |          |          |                    |       |       |
|--------------------|----------|----------|----------|----------|----------|----------|--------------------|-------|-------|
| SM(d41:2)          | 3,55E+07 | 4,47E+05 | 3,40E+07 | 9,33E+05 | 4,25E+07 | 7,78E+06 | SM(d41:2)          | 0,982 | 0,967 |
| SM(d41:1)          | 1,91E+08 | 4,42E+06 | 1,83E+08 | 8,22E+06 | 1,85E+08 | 3,87E+07 | SM(d41:1)          | 0,997 | 0,958 |
| SM(t40:1)          | 4,00E+07 | 1,05E+06 | 3,89E+07 | 2,31E+06 | 3,97E+07 | 1,74E+07 | SM(t40:1)          | 0,994 | 0,870 |
| SM(t40:0)          | 7,50E+07 | 1,65E+06 | 7,43E+07 | 4,59E+06 | 7,61E+07 | 3,20E+07 | SM(t40:0)          | 0,994 | 0,882 |
| SM(d42:4)          | 8,40E+07 | 3,69E+06 | 7,88E+07 | 2,25E+06 | 9,49E+07 | 1,34E+07 | SM(d42:4)          | 0,995 | 0,981 |
| SM(d42:3)          | 5,92E+08 | 2,53E+07 | 5,44E+08 | 1,55E+07 | 6,14E+08 | 1,18E+08 | SM(d42:3)          | 0,977 | 0,957 |
| SM(d42:2)          | 1,06E+09 | 1,15E+07 | 1,13E+09 | 1,09E+08 | 1,36E+09 | 2,85E+08 | SM(d42:2)          | 0,992 | 0,936 |
| SM(d42:1)          | 3,70E+09 | 9,53E+07 | 3,53E+09 | 1,02E+08 | 4,22E+09 | 1,13E+09 | SM(d42:1)          | 0,990 | 0,934 |
| SM(t41:1)          | 3,47E+07 | 9,71E+05 | 3,35E+07 | 2,18E+06 | 3,26E+07 | 1,49E+07 | SM(t41:1)          | 0,997 | 0,862 |
| SM(d42:0)          | 2,17E+07 | 7,18E+05 | 2,03E+07 | 4,82E+05 | 2,25E+07 | 4,28E+06 | SM(d42:0)          | 0,995 | 0,965 |
| SM(t41:0)          | 4,22E+07 | 1,13E+06 | 3,99E+07 | 7,91E+05 | 4,18E+07 | 1,63E+07 | SM(t41:0)          | 0,989 | 0,889 |
| SM(d43:1)          | 5,26E+07 | 1,72E+06 | 4,96E+07 | 2,51E+06 | 4,77E+07 | 7,31E+06 | SM(d43:1)          | 0,996 | 0,971 |
| SM(t42:1)          | 5,45E+07 | 1,52E+06 | 5,30E+07 | 4,45E+06 | 5,18E+07 | 2,21E+07 | SM(t42:1)          | 0,991 | 0,870 |
| SM(t42:0)          | 7,96E+07 | 1,84E+06 | 7,84E+07 | 4,68E+06 | 7,77E+07 | 3,01E+07 | SM(t42:0)          | 0,994 | 0,888 |
| SM(d44:5)          | 8,65E+07 | 8,07E+06 | 7,78E+07 | 4,52E+06 | 8,39E+07 | 1,75E+07 | SM(d44:5)          | 0,996 | 0,958 |
| SM(d44:3)          | 9,85E+06 | 4,57E+05 | 8,98E+06 | 6,49E+05 | 9,47E+06 | 2,01E+06 | SM(d44:3)          | 0,997 | 0,747 |
| SM(d44:2)          | 2,06E+07 | 1,18E+06 | 1,97E+07 | 2,55E+05 | 2,35E+07 | 3,94E+06 | SM(d44:2)          | 0,976 | 0,969 |
| SM(d44:1)          | 8,32E+07 | 4,67E+06 | 8,10E+07 | 8,14E+05 | 7,61E+07 | 1,64E+07 | SM(d44:1)          | 1,000 | 0,949 |
| SPHP(m20:1)        | 1,00E+07 | 6,91E+05 | 1,10E+07 | 5,22E+05 | 1,22E+06 | 1,84E+06 | SPHP(m20:1)        | 0,981 | 0,161 |
| ST(m40:1)          | 4,27E+07 | 5,59E+06 | 4,08E+07 | 3,11E+06 | 2,62E+07 | 1,29E+07 | ST(m40:1)          | 0,841 | 0,886 |
| ST(m41:1)          | 5,28E+07 | 9,08E+06 | 5,00E+07 | 1,32E+07 | 3,29E+07 | 2,06E+07 | ST(m41:1)          | 0,790 | 0,808 |
| TG(4:0_16:0_16:0)  | 1,14E+07 | 5,79E+05 | 1,02E+07 | 1,01E+06 | 1,14E+07 | 1,02E+06 | TG(4:0_16:0_16:0)  | 0,984 | 0,990 |
| TG(4:0_16:0_18:2)  | 2,76E+07 | 6,10E+05 | 2,32E+07 | 8,16E+06 | 2,98E+07 | 1,92E+06 | TG(4:0_16:0_18:2)  | 0,937 | 0,995 |
| TG(4:0_16:0_18:1)  | 5,51E+07 | 2,45E+06 | 5,24E+07 | 4,83E+06 | 5,89E+07 | 3,53E+06 | TG(4:0_16:0_18:1)  | 0,963 | 0,996 |
| TG(16:0_12:0_14:0) | 5,99E+06 | 4,95E+05 | 5,53E+06 | 1,69E+05 | 4,86E+06 | 1,30E+06 | TG(16:0_12:0_14:0) | 0,978 | 0,899 |
| TG(16:0_14:0_14:0) | 2,09E+07 | 4,05E+05 | 1,95E+07 | 1,55E+06 | 1,96E+07 | 3,09E+06 | TG(16:0_14:0_14:0) | 0,983 | 0,978 |
| TG(16:1_14:0_16:1) | 9,83E+07 | 6,11E+06 | 9,41E+07 | 4,08E+06 | 7,15E+07 | 9,11E+06 | TG(16:1_14:0_16:1) | 0,976 | 0,973 |
| TG(16:0_14:0_16:1) | 1,75E+08 | 6,99E+06 | 1,71E+08 | 1,00E+07 | 1,39E+08 | 4,49E+06 | TG(16:0_14:0_16:1) | 0,983 | 0,979 |
| TG(16:0_14:0_16:0) | 1,83E+08 | 1,30E+07 | 1,72E+08 | 5,10E+06 | 1,60E+08 | 8,27E+06 | TG(16:0_14:0_16:0) | 0,991 | 0,996 |
| TG(15:0_16:1_16:1) | 1,34E+07 | 1,97E+06 | 1,23E+07 | 3,33E+05 | 1,10E+07 | 5,10E+06 | TG(15:0_16:1_16:1) | 0,943 | 0,698 |
| TG(16:1_16:1_16:1) | 2,83E+08 | 1,03E+07 | 2,67E+08 | 8,42E+06 | 1,66E+08 | 1,01E+07 | TG(16:1_16:1_16:1) | 0,986 | 0,982 |
| TG(16:0_16:1_16:1) | 1,10E+09 | 4,01E+07 | 1,09E+09 | 6,76E+07 | 8,58E+08 | 1,06E+07 | TG(16:0_16:1_16:1) | 0,996 | 0,995 |
| TG(16:0_16:0_16:1) | 1,34E+09 | 8,54E+07 | 1,29E+09 | 7,42E+07 | 1,13E+09 | 1,28E+08 | TG(16:0_16:0_16:1) | 0,988 | 0,986 |

|                    |          |          |          |          |          |          |                    |       |       |
|--------------------|----------|----------|----------|----------|----------|----------|--------------------|-------|-------|
| TG(15:0_16:0_18:2) | 1,22E+08 | 9,89E+06 | 1,28E+08 | 3,37E+06 | 7,85E+07 | 1,35E+07 | TG(15:0_16:0_18:2) | 0,979 | 0,952 |
| TG(15:0_16:0_18:1) | 9,08E+07 | 1,44E+06 | 8,71E+07 | 4,42E+06 | 6,55E+07 | 1,39E+07 | TG(15:0_16:0_18:1) | 0,983 | 0,961 |
| TG(18:2_14:1_18:2) | 9,37E+07 | 6,47E+06 | 9,27E+07 | 6,38E+06 | 3,87E+07 | 7,33E+06 | TG(18:2_14:1_18:2) | 0,981 | 0,921 |
| TG(18:4_16:0_16:1) | 8,55E+07 | 8,97E+06 | 8,21E+07 | 2,56E+06 | 8,66E+07 | 3,25E+06 | TG(18:4_16:0_16:1) | 0,866 | 0,906 |
| TG(16:1_16:1_18:2) | 7,29E+08 | 3,09E+07 | 6,82E+08 | 1,78E+07 | 3,75E+08 | 1,02E+07 | TG(16:1_16:1_18:2) | 0,987 | 0,990 |
| TG(16:0_16:0_18:3) | 3,05E+09 | 1,38E+08 | 2,70E+09 | 8,30E+07 | 1,99E+09 | 2,29E+08 | TG(16:0_16:0_18:3) | 0,990 | 0,967 |
| TG(16:0_16:1_18:1) | 5,76E+09 | 2,44E+08 | 5,83E+09 | 4,50E+08 | 4,84E+09 | 2,32E+08 | TG(16:0_16:1_18:1) | 0,957 | 0,987 |
| TG(16:0_16:0_18:1) | 4,12E+09 | 1,80E+08 | 3,77E+09 | 2,98E+08 | 4,33E+09 | 3,23E+08 | TG(16:0_16:0_18:1) | 0,972 | 0,914 |
| TG(15:0_18:2_18:2) | 8,79E+07 | 3,36E+06 | 8,53E+07 | 6,91E+06 | 4,06E+07 | 6,54E+05 | TG(15:0_18:2_18:2) | 0,984 | 0,996 |
| TG(15:0_18:1_18:2) | 2,11E+08 | 2,71E+06 | 2,00E+08 | 7,98E+06 | 1,12E+08 | 7,65E+06 | TG(15:0_18:1_18:2) | 0,995 | 0,994 |
| TG(16:0_17:0_18:2) | 2,22E+08 | 1,05E+07 | 2,12E+08 | 7,45E+06 | 1,41E+08 | 1,15E+07 | TG(16:0_17:0_18:2) | 0,984 | 0,989 |
| TG(18:0_16:0_17:0) | 7,50E+06 | 1,19E+06 | 7,65E+06 | 1,43E+06 | 7,58E+06 | 1,47E+06 | TG(18:0_16:0_17:0) | 0,965 | 0,915 |
| TG(16:1_18:2_18:3) | 1,54E+08 | 1,56E+07 | 1,59E+08 | 3,93E+06 | 5,69E+07 | 5,65E+06 | TG(16:1_18:2_18:3) | 0,990 | 0,950 |
| TG(16:0_14:0_22:6) | 1,40E+07 | 3,23E+05 | 1,22E+07 | 4,76E+05 | 1,05E+07 | 4,47E+05 | TG(16:0_14:0_22:6) | 0,998 | 0,993 |
| TG(16:0_16:1_20:4) | 8,83E+07 | 1,38E+07 | 7,72E+07 | 2,24E+07 | 3,48E+07 | 1,34E+07 | TG(16:0_16:1_20:4) | 0,917 | 0,681 |
| TG(16:1_18:1_18:2) | 6,87E+09 | 2,91E+08 | 6,95E+09 | 3,14E+08 | 4,29E+09 | 1,70E+08 | TG(16:1_18:1_18:2) | 0,991 | 0,988 |
| TG(16:0_18:1_18:1) | 7,34E+09 | 3,97E+08 | 7,25E+09 | 1,63E+08 | 6,05E+09 | 2,80E+08 | TG(16:0_18:1_18:1) | 0,995 | 0,996 |
| TG(18:0_16:0_18:1) | 1,75E+09 | 1,91E+08 | 1,55E+09 | 1,56E+08 | 1,80E+09 | 1,44E+08 | TG(18:0_16:0_18:1) | 0,985 | 0,990 |
| TG(18:1_17:1_18:2) | 1,61E+08 | 3,66E+06 | 1,61E+08 | 5,71E+06 | 7,98E+07 | 6,73E+06 | TG(18:1_17:1_18:2) | 0,998 | 0,993 |
| TG(17:0_18:1_18:2) | 2,06E+08 | 1,41E+07 | 1,93E+08 | 4,55E+06 | 1,18E+08 | 6,45E+06 | TG(17:0_18:1_18:2) | 0,996 | 0,995 |
| TG(17:0_18:1_18:1) | 9,80E+07 | 8,80E+06 | 8,82E+07 | 9,83E+05 | 6,53E+07 | 2,99E+06 | TG(17:0_18:1_18:1) | 0,979 | 0,996 |
| TG(16:1_18:2_20:5) | 1,36E+08 | 3,07E+07 | 1,07E+08 | 2,90E+07 | 1,07E+08 | 4,68E+06 | TG(16:1_18:2_20:5) | 0,822 | 0,944 |
| TG(16:0_16:1_22:6) | 3,27E+07 | 2,96E+06 | 3,22E+07 | 1,10E+06 | 2,06E+07 | 2,56E+05 | TG(16:0_16:1_22:6) | 0,992 | 0,996 |
| TG(18:2_18:2_18:2) | 2,14E+09 | 1,15E+08 | 2,08E+09 | 1,03E+08 | 8,71E+08 | 3,03E+07 | TG(18:2_18:2_18:2) | 0,997 | 0,994 |
| TG(16:0_18:2_20:4) | 3,57E+08 | 2,02E+07 | 3,86E+08 | 4,01E+07 | 2,27E+08 | 2,18E+07 | TG(16:0_18:2_20:4) | 0,977 | 0,986 |
| TG(16:0_16:0_22:6) | 1,23E+08 | 6,39E+06 | 1,36E+08 | 1,89E+07 | 1,59E+08 | 3,45E+07 | TG(16:0_16:0_22:6) | 0,945 | 0,919 |
| TG(18:1_18:2_18:2) | 4,86E+09 | 1,75E+08 | 4,90E+09 | 3,06E+08 | 2,71E+09 | 1,35E+08 | TG(18:1_18:2_18:2) | 0,988 | 0,982 |
| TG(16:0_18:1_20:4) | 3,79E+08 | 6,33E+07 | 3,60E+08 | 2,56E+07 | 2,09E+08 | 2,46E+07 | TG(16:0_18:1_20:4) | 0,995 | 0,986 |
| TG(18:1_18:1_18:2) | 5,25E+09 | 9,94E+07 | 5,17E+09 | 3,22E+08 | 3,54E+09 | 1,86E+08 | TG(18:1_18:1_18:2) | 0,980 | 0,984 |
| TG(18:1_18:1_18:1) | 3,93E+09 | 1,12E+08 | 3,91E+09 | 2,84E+08 | 3,09E+09 | 1,89E+08 | TG(18:1_18:1_18:1) | 0,985 | 0,974 |
| TG(18:0_18:1_18:1) | 1,35E+09 | 1,37E+08 | 1,45E+09 | 3,37E+08 | 1,49E+09 | 1,29E+08 | TG(18:0_18:1_18:1) | 0,922 | 0,958 |
| TG(18:0_18:0_18:1) | 1,42E+08 | 1,75E+07 | 1,39E+08 | 1,85E+07 | 2,12E+08 | 2,27E+07 | TG(18:0_18:0_18:1) | 0,942 | 0,776 |
| TG(19:1_18:2_18:2) | 2,21E+07 | 1,16E+06 | 2,48E+07 | 3,31E+06 | 1,26E+07 | 2,72E+06 | TG(19:1_18:2_18:2) | 0,938 | 0,916 |

|                    |          |          |          |          |          |          |                    |       |       |
|--------------------|----------|----------|----------|----------|----------|----------|--------------------|-------|-------|
| TG(18:3_18:2_20:5) | 3,75E+07 | 5,78E+06 | 3,33E+07 | 1,51E+06 | 1,77E+07 | 6,26E+05 | TG(18:3_18:2_20:5) | 0,972 | 0,991 |
| TG(16:0_20:4_20:5) | 3,58E+07 | 4,14E+06 | 3,59E+07 | 5,10E+06 | 2,46E+07 | 7,40E+05 | TG(16:0_20:4_20:5) | 0,878 | 0,960 |
| TG(18:2_18:2_20:4) | 1,19E+08 | 9,17E+06 | 1,12E+08 | 9,91E+06 | 4,31E+07 | 1,71E+06 | TG(18:2_18:2_20:4) | 0,980 | 0,971 |
| TG(16:0_20:4_20:4) | 1,35E+08 | 9,64E+06 | 1,23E+08 | 1,52E+07 | 7,23E+07 | 5,14E+06 | TG(16:0_20:4_20:4) | 0,985 | 0,987 |
| TG(18:1_18:2_20:5) | 1,97E+08 | 1,31E+07 | 1,96E+08 | 1,32E+07 | 1,72E+08 | 8,50E+06 | TG(18:1_18:2_20:5) | 0,878 | 0,873 |
| TG(18:1_18:2_20:4) | 2,56E+08 | 1,62E+07 | 2,45E+08 | 1,27E+07 | 1,25E+08 | 8,00E+06 | TG(18:1_18:2_20:4) | 0,995 | 0,986 |
| TG(18:1_18:1_20:4) | 3,63E+08 | 6,04E+07 | 3,24E+08 | 2,62E+06 | 2,13E+08 | 7,97E+06 | TG(18:1_18:1_20:4) | 0,992 | 0,986 |
| TG(16:0_18:1_22:5) | 3,40E+07 | 4,04E+06 | 3,10E+07 | 3,54E+06 | 2,91E+07 | 2,68E+06 | TG(16:0_18:1_22:5) | 0,969 | 0,989 |
| TG(16:0_18:1_22:4) | 2,25E+08 | 3,44E+07 | 2,06E+08 | 1,78E+07 | 1,18E+08 | 1,15E+07 | TG(16:0_18:1_22:4) | 0,957 | 0,989 |
| TG(18:0_18:1_20:4) | 1,05E+08 | 4,27E+06 | 9,82E+07 | 3,61E+06 | 7,75E+07 | 5,16E+06 | TG(18:0_18:1_20:4) | 0,997 | 0,981 |
| TG(20:1_18:1_18:2) | 2,85E+08 | 2,12E+07 | 2,61E+08 | 6,67E+06 | 1,95E+08 | 1,40E+07 | TG(20:1_18:1_18:2) | 0,994 | 0,989 |
| TG(20:1_18:1_18:1) | 2,39E+08 | 3,82E+07 | 2,24E+08 | 2,64E+07 | 1,74E+08 | 1,04E+07 | TG(20:1_18:1_18:1) | 0,980 | 0,987 |
| TG(16:0_20:4_22:6) | 2,62E+07 | 1,81E+06 | 2,49E+07 | 6,15E+05 | 2,45E+07 | 7,56E+05 | TG(16:0_20:4_22:6) | 0,999 | 0,989 |
| TG(16:0_20:4_22:4) | 7,45E+07 | 6,74E+06 | 6,82E+07 | 1,41E+07 | 2,50E+07 | 3,54E+06 | TG(16:0_20:4_22:4) | 0,965 | 0,965 |
| TG(18:0_20:4_20:4) | 7,76E+07 | 1,30E+06 | 7,88E+07 | 6,06E+06 | 3,01E+07 | 2,61E+06 | TG(18:0_20:4_20:4) | 0,989 | 0,984 |
| TG(22:1_18:2_18:2) | 1,92E+07 | 4,30E+06 | 1,62E+07 | 9,52E+05 | 1,21E+07 | 4,71E+05 | TG(22:1_18:2_18:2) | 0,974 | 0,986 |
| TG(18:1_18:1_22:1) | 9,75E+07 | 2,81E+07 | 1,07E+08 | 5,42E+06 | 8,33E+07 | 3,47E+06 | TG(18:1_18:1_22:1) | 0,953 | 0,945 |
| TG(22:4_18:2_22:4) | 3,17E+07 | 2,35E+06 | 3,11E+07 | 4,57E+06 | 6,48E+06 | 1,62E+06 | TG(22:4_18:2_22:4) | 0,959 | 0,790 |
