# Supplementary material
Source: MDPI journal article supplement (https://www.mdpi.com/2297-8739/9/10/268)

Supplementary Figure S2. Distribution of lipid species among each lipid class (%). Data represent the mean  $\pm$  SD of results obtained with homogenates obtained from kidney mass containing 0.5 mg of protein (n = 3).

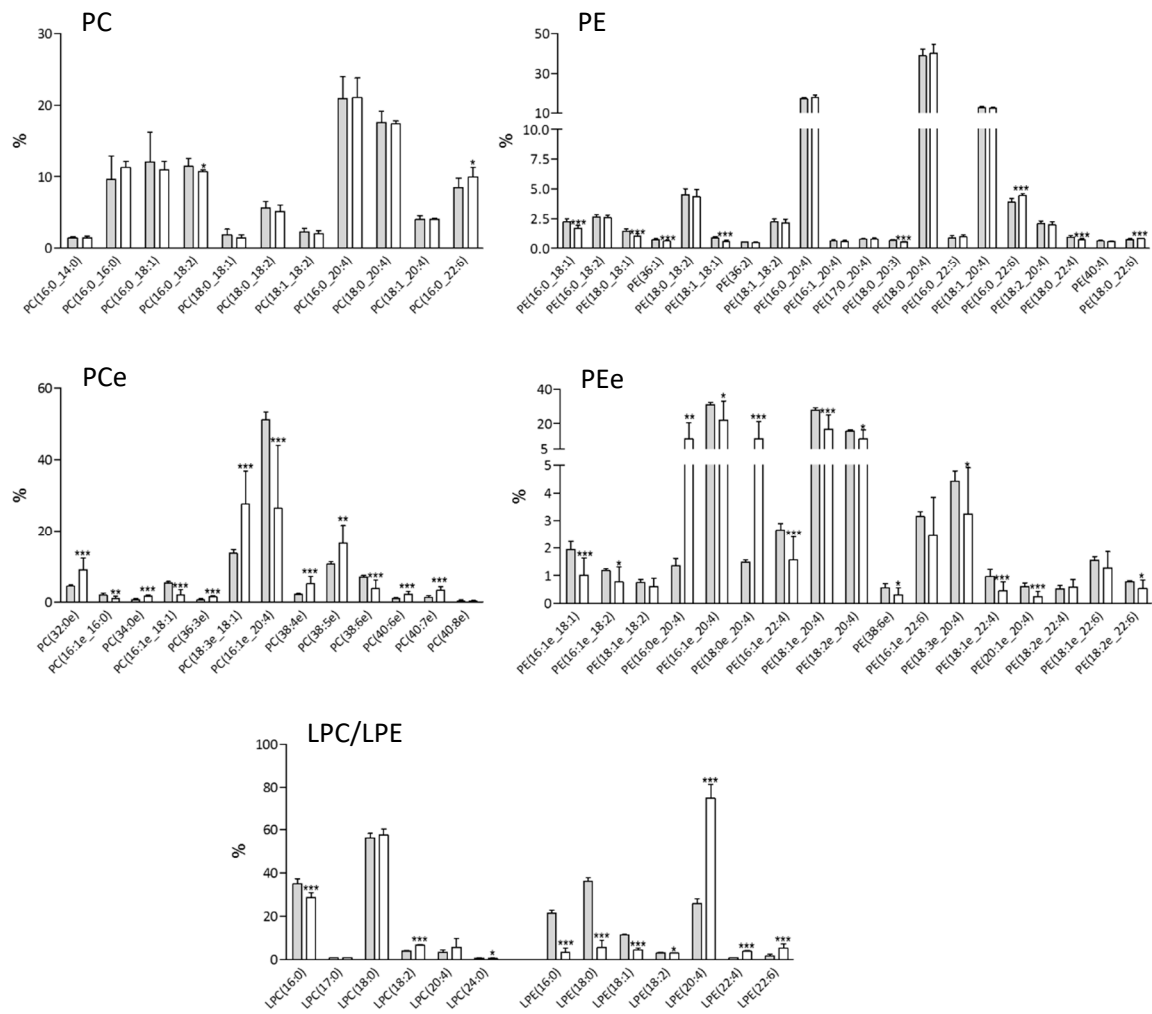



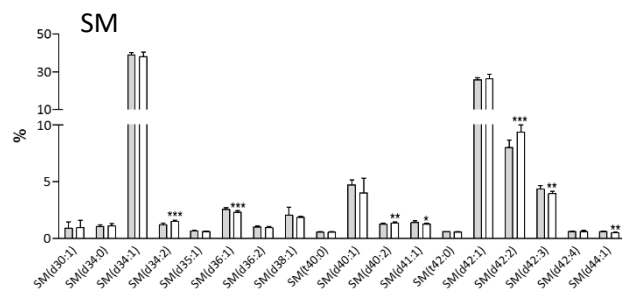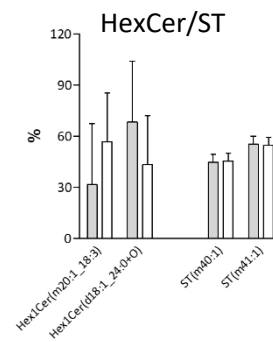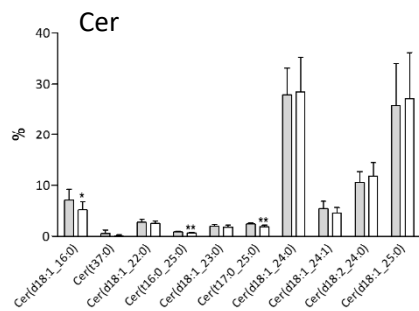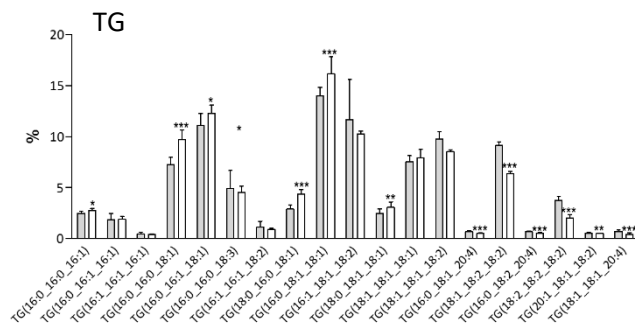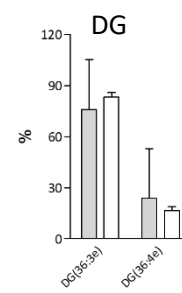

Supplement: s1 [file s1]
