# Supplementary material
Source: MDPI journal article supplement (https://www.mdpi.com/2297-8739/9/10/268)

Supplementary Figure S1. Representative base peak intensity chromatograms of PBS- and Trizol-homogenized samples analyzed by UHPLC-MS. (A) UHPLC-(ESI+)-QOrbitrap MS/MS. (B) UHPLC-(ESI-)-QOrbitrap MS/MS.

A

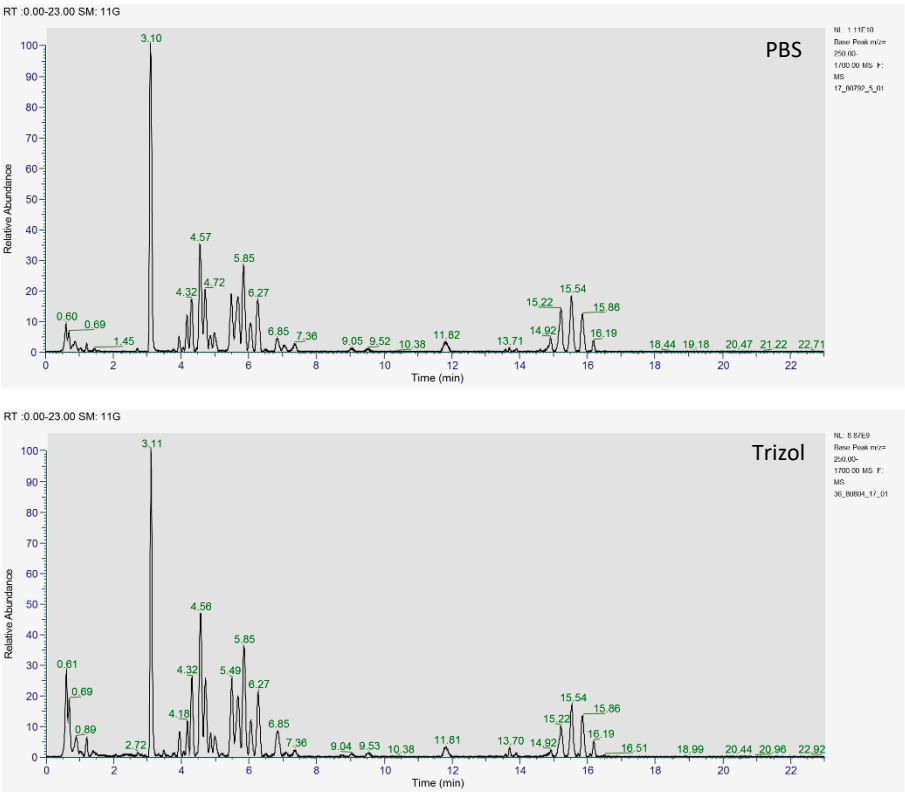

B

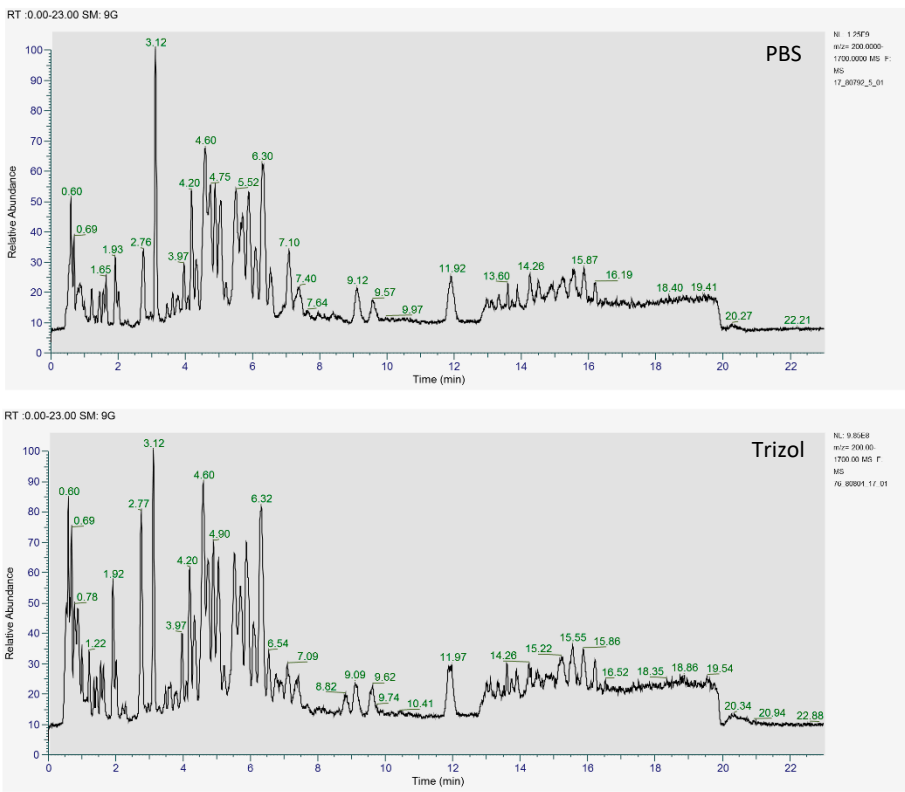

Supplement: s1 [file s1]
